# Supplementary material for: Mouse fetal intestinal organoids: new model to study epithelial maturation from suckling to weaning
Source: PubMed Central journal article supplement — EMBO Rep. 2018 Dec 10;20(2):e46221. doi: 10.15252/embr.201846221 (PMC6362357; doi:10.15252/embr.201846221), 2018-12-10
Supplement: EMBR-20-e46221-s001.pdf [file EMBR-20-e46221-s001.pdf]

**Table of contents**

**Appendix Figure S1: *In vitro* maturation follows similar pattern in both proximal and distal organoids. 2**

**Appendix Figure S2: Expression of stem cell marker *Lgr5* and Paneth cell marker lysozyme in fetal organoids over time..... 4**

**Appendix Figure S3: Differentiation markers are similarly expressed in fetal organoids during culture. 6**

**Appendix Figure S4: Dexamethasone does not affect enzyme activity of adult organoids. .... 8**

**Appendix Table S1: Composition of organoid culture medium (ENR)..... 10**

**Appendix Table S2: List of primers used in the qRT-PCR..... 10**

# Appendix Figure S1

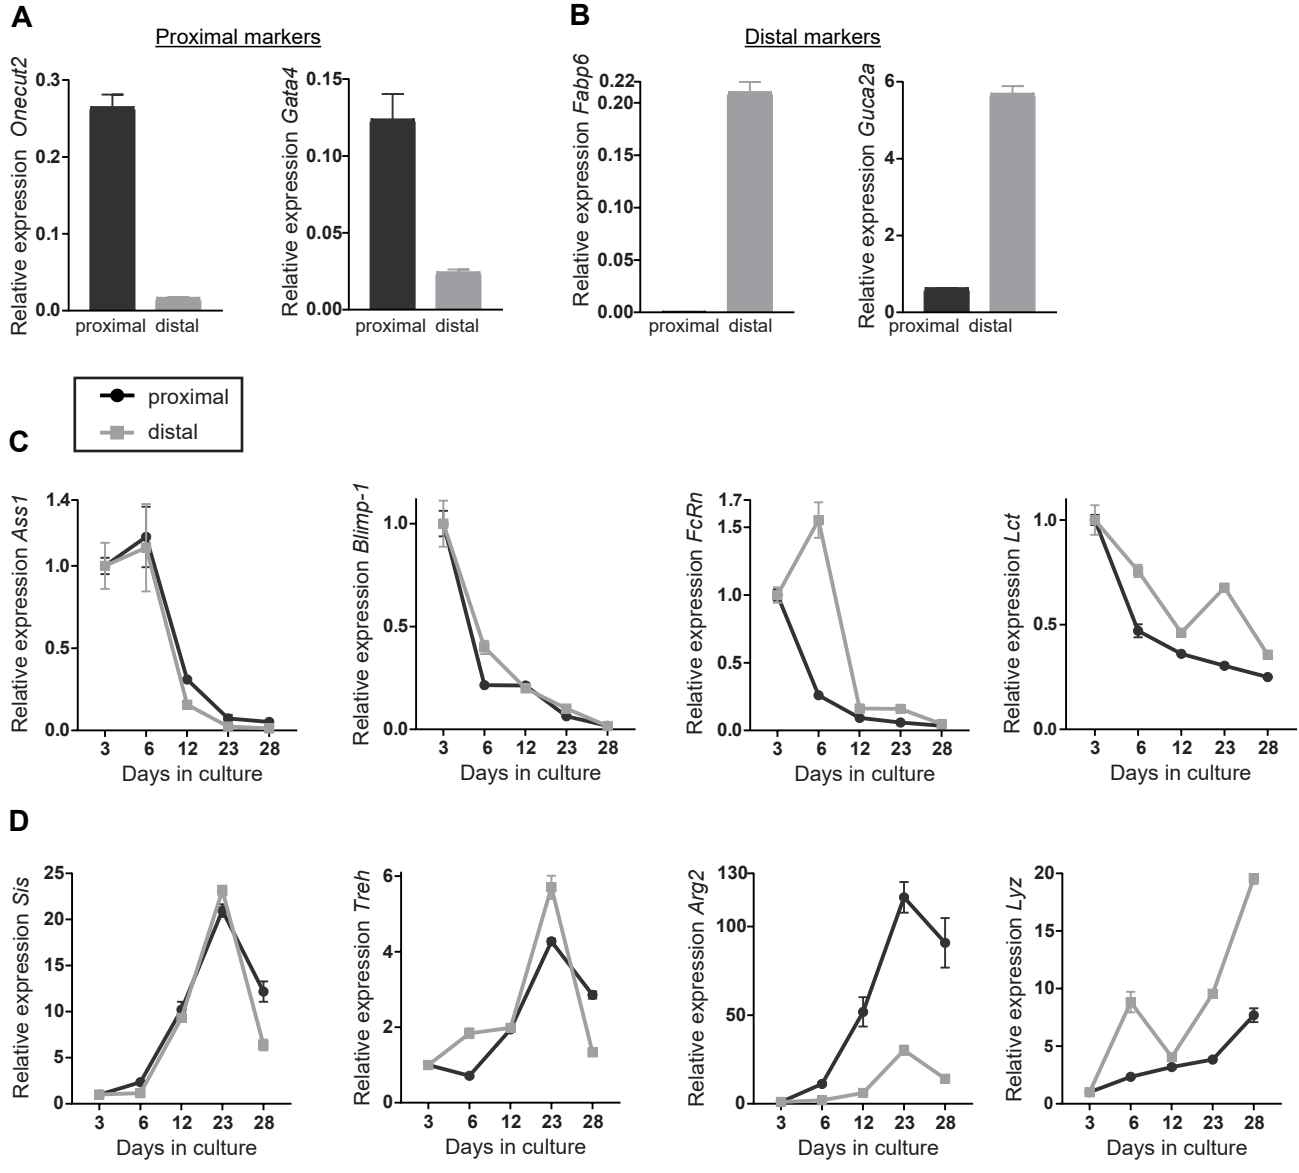

**Appendix Figure S1: *In vitro* maturation follows similar pattern in both proximal and distal organoids.**

A Proximal markers *Onecut2* and *Gata4* are highly expressed in organoids isolated from the proximal region of the small intestine.

B Distal markers *Fabp6* and *Guca2a* are highly expressed in organoids isolated from the distal region of the small intestine.

C Expression of the neonatal markers *Ass1*, *Blimp-1*, *FcRn* and *Lct* decreases in the same way in both proximal and distal organoids.

D Adult markers *Sis*, *Treh*, *Arg2* and *Lyz* similarly increase their expression in both proximal and distal organoids.

Data information: Data are presented as mean  $\pm$  SEM (n=3, individual wells from single organoid culture (see material and methods). Experiment was repeated in two independent organoid cultures with similar results)

Appendix Figure S2

A

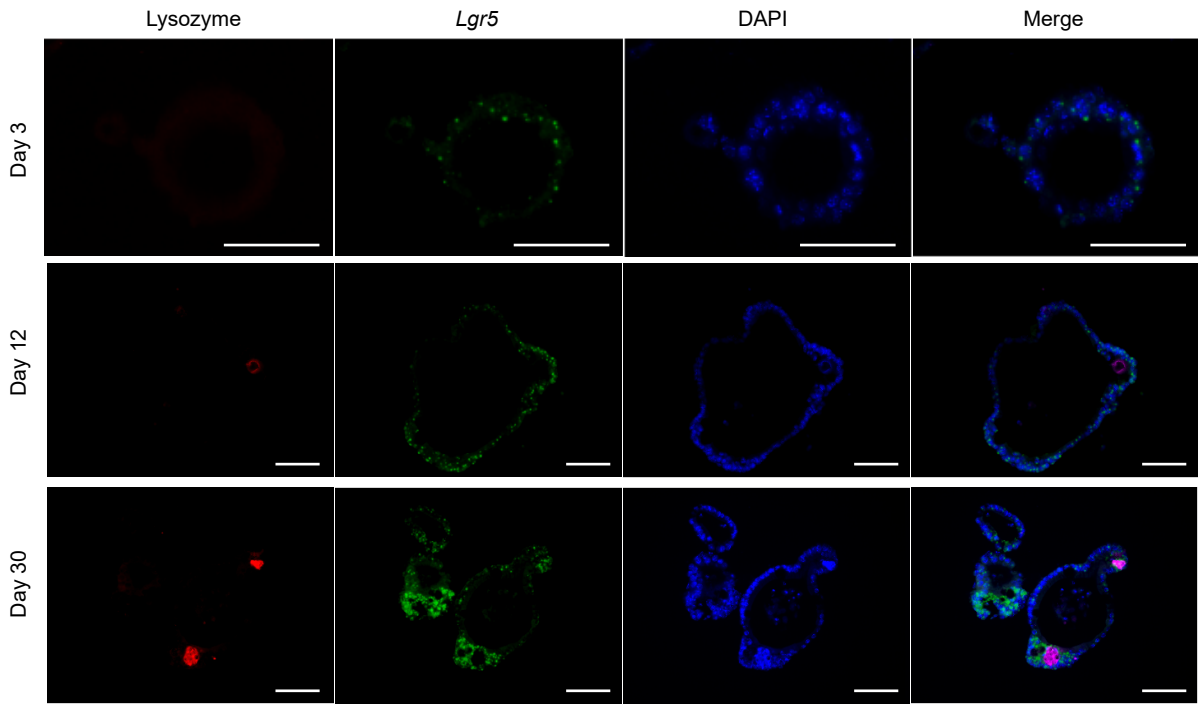

**Appendix Figure S2: Expression of stem cell marker *Lgr5* and Paneth cell marker lysozyme in fetal organoids over time.**

A – *Lgr5* is present at day 3 and its expression increases and becomes localized in the crypt region, while lysozyme is absent in the beginning of the culture and starts to appear at the crypt region after day 12.

Appendix Figure S3

A

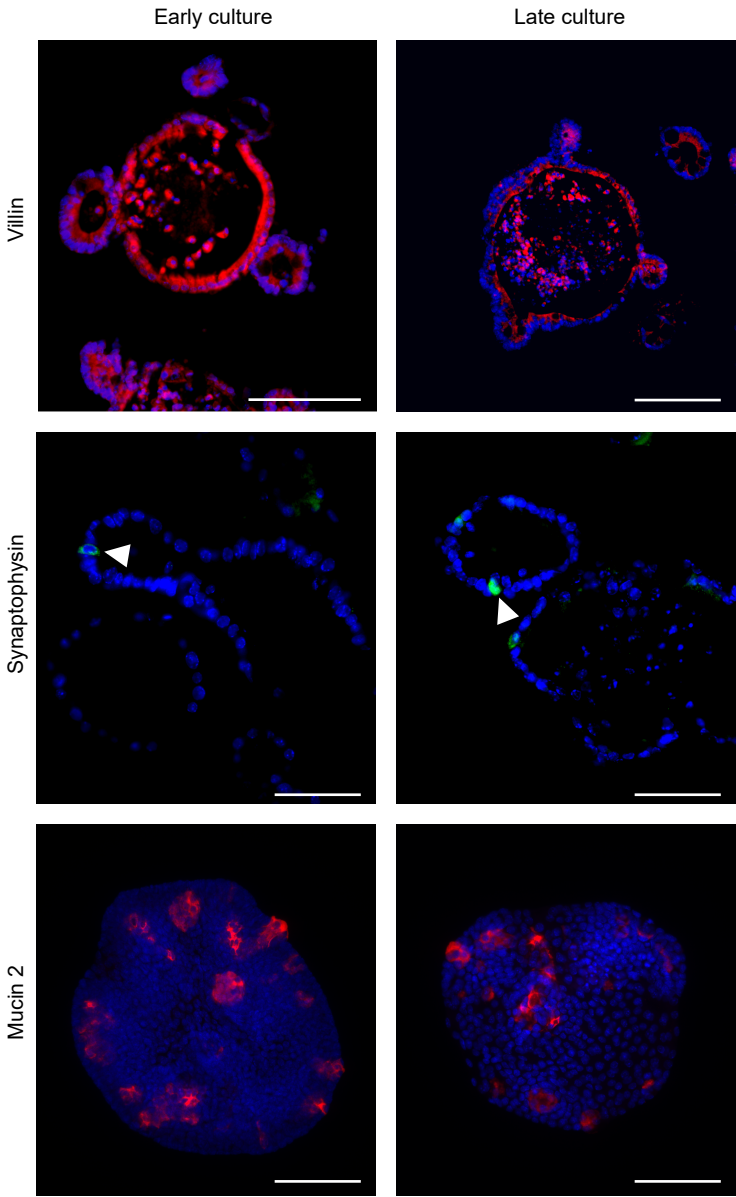

**Appendix Figure S3: Differentiation markers are similarly expressed in fetal organoids during culture.**

A – Enterocyte marker Villin, enteroendocrine marker Synaptophysin and goblet cell marker Muc2 are present at early and late culture.

# Appendix Figure S4

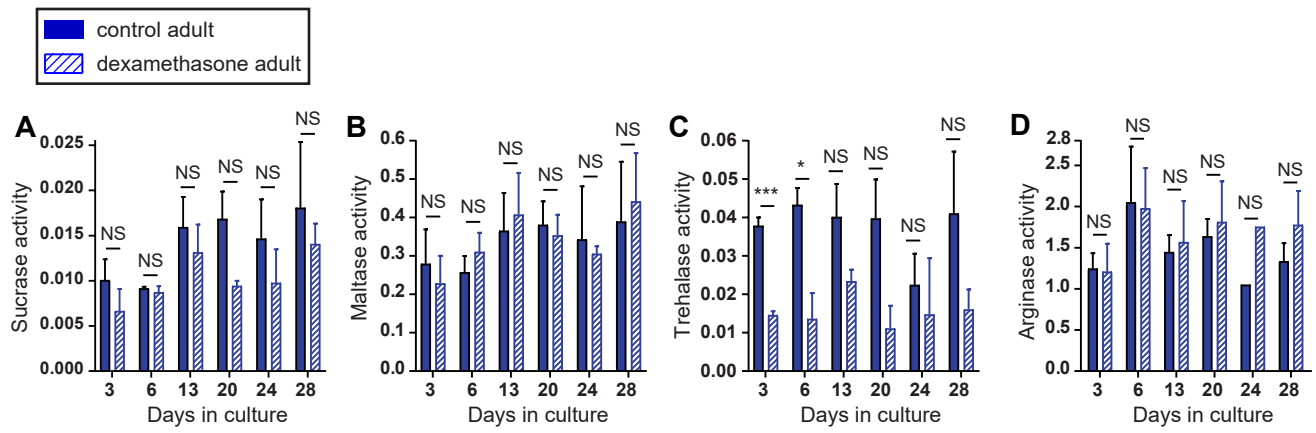



**Appendix Figure S4: Dexamethasone does not affect enzyme activity of adult organoids.**

A-D Enzyme activity levels in adult organoids treated with dexamethasone (▨) remain the same compared to control adult organoids (■). The graph in this experiment is reusing treated adult levels from experiment presented in Fig3 I-L including the untreated adult control samples. Activity is given in  $\mu\text{M glucose}/\mu\text{g protein}\cdot\text{min}^{-1}$ . NS = 2. Data plotted as mean  $\pm$ SEM. \* $p < 0.05$ , NS not significant calculated by two-way ANOVA. Activity values of control adult organoids are the same as Figure 3I-L (n=3, independent organoid cultures).

**Appendix Table S1. Composition of organoid culture medium (ENR).**

| Compound                   | Concentration | Company       | Product nr. |
|----------------------------|---------------|---------------|-------------|
| Advanced DMEM/F12          |               | Invitrogen    | 12634-028   |
| Glutamax 100x              | 1x            | Invitrogen    | 35050-038   |
| Hepes 1M                   | 0.01 M        | Invitrogen    | 15630-056   |
| Pen/Strep                  | 0.2 U/ml      | Invitrogen    | 15140-122   |
| N2 supplement 100x         | 1x            | Invitrogen    | 17502-048   |
| B27 supplement 100x        | 1x            | Invitrogen    | 17504-044   |
| n-Acetylcysteine           | 1.25 mM       | Sigma-Aldrich | A9165-5G    |
| EGF                        | 0.05 µg/ml    | Invitrogen    | PMG8045     |
| mNoggin conditioned medium | 20%           | Home made*    |             |
| Rspo1 conditioned medium   | 10%           | Home made*    |             |

\* Noggin-Fc and Rspo1-Fc conditioned media were produced by stably transfected HEK cells.

**Appendix Table S2. List of primers used in the qRT-PCR.**

| Gene    | Forward primer (5'-3')       | Reverse primer (5'-3')     | NM number                      |
|---------|------------------------------|----------------------------|--------------------------------|
| Ass1    | CATTGGAATGAAGTCCCGAG         | GATTTTGCCTACTTCCCGAT       | NM_007494                      |
| Arg2    | TAGGGTAATCCCCTCCCTGC         | AGCAAGCCAGCTTCTCGAAT       | NM_009705                      |
| Blimp-1 | ACCAAGGAACCTGCTTTTCA         | TAGACTTCACCGATGAGGGG       | NM_007548                      |
| ChgA    | GTCTCCAGACACTCAGGGCT         | ATGACAAAAGGGGACACCAA       | NM_007693                      |
| Cnx43   | TGGGGGAAAGGCGTGAGGGA         | ACCATGTCTGGCACCTCTCTT      | NM_010288                      |
| Cramp   | AATCTTCTCCCCACCTTTGC         | GCCGCTGATTCTTTTGACAT       | NM_009921                      |
| Cyclo   | ATGGTCAACCCACCGTGT           | TTCTGCTGTCTTTGGAACCTTGTGTC | NM_008907                      |
| Defcr1  | AAGAGACTAAAAGTGGAGGAGCAGC    | CGACAGCAGAGCGTGTA          | NM_010031                      |
| Defcr5  | AGGCTGATCCTATCCACAAAACAG     | TGAAGAGCAGACCCTTCTTGGC-    | NM_007851                      |
| Fabp6   | ACGTGATTGAAAGGGGACGTAACCTT   | CATTCTTTGCCAATGGTGAACCTTGT | NM_008375.2                    |
| FcRn    | CTCAGGCGCATAGACGG            | CTAAACTCTTGCCGGAGCG        | NM_010189;<br>NM_001357117     |
| Gata4   | CTGGAGGCGAGATGGGACGGGACACTAC | CCGCAGGCATTACATACAGGCTCACC | NM_008092.4;<br>NM_001310610.1 |
| Guca2a  | GATCCTGCAGAGGCTAGAGG         | CCACATGGGCTGAGAGAAAG       | NM_008190.1                    |
| Lct     | TATGCAGGCTACGGCACCGG         | GCCAAGTTCTGGCATGCGCC       | NM_001081078                   |
| Lgr5    | TGTGTCAAAGCATTTCCAGC         | CAGCGTCTTACCTCCTACC        | NM_010195                      |
| Lyz1    | GGATGGCTACCGTGGTGTCAAGC      | TCCATAGTCGGTCTTCGGTC       | NM_013590                      |
| Muc2    | GAAGCCAGATCCGAAACCA          | GAATCGGTAGACATCGCCGT       | NM_023566                      |
| Onecut2 | AGAGGGTTCTATGCCGGTCT         | GGGATTTCTTCTGCGAGTTG       | NM_194268.2                    |
| Sis     | AGGTGTCCGCTGAGCAAGGT         | ATGGACGCCAGCAACAGCCA       | NM_001081137                   |
| Treh    | GCACCTGCTGCTTCTGCT           | CATCTGAACCTTGGTGCAGGA      | NM_021481                      |
| Vil1    | ATCTCCCTGAGGGTGTGGAC         | AGAGAAGGCAGCTGGAGTCA       | NM_009509                      |
