# Supplementary material for: Mouse fetal intestinal organoids: new model to study epithelial maturation from suckling to weaning
Source: PubMed Central journal article supplement — EMBO Rep. 2018 Dec 10;20(2):e46221. doi: 10.15252/embr.201846221 (PMC6362357; doi:10.15252/embr.201846221), 2018-12-10
Supplement: EMBR-20-e46221-s002.pdf [file EMBR-20-e46221-s002.pdf]

## Expanded View Figures

**A**

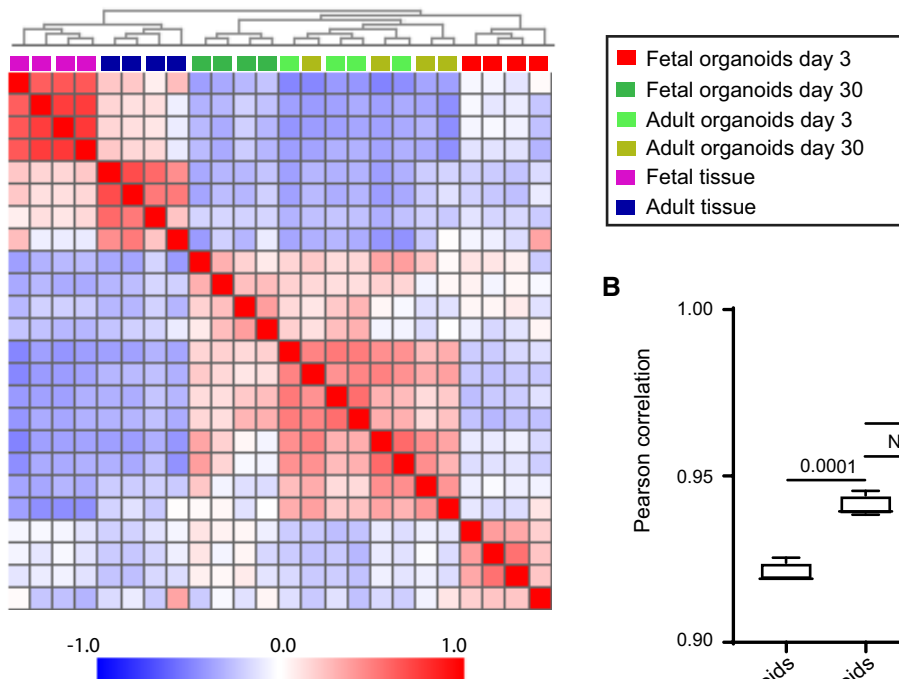

**B**

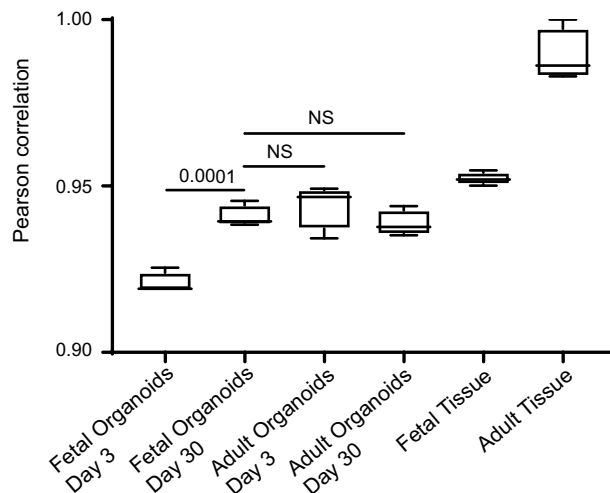

**C**

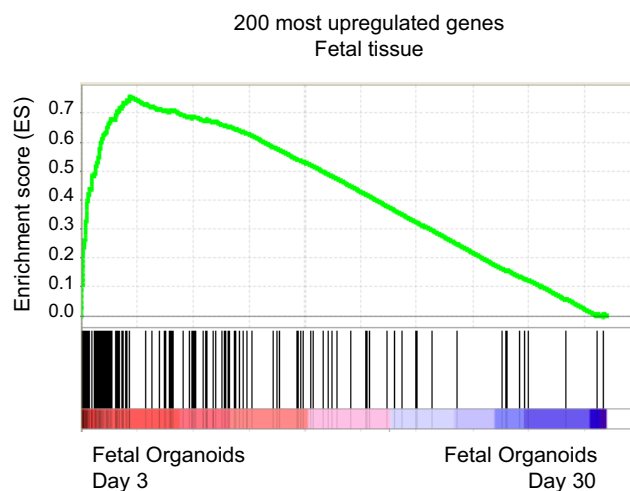

**D**

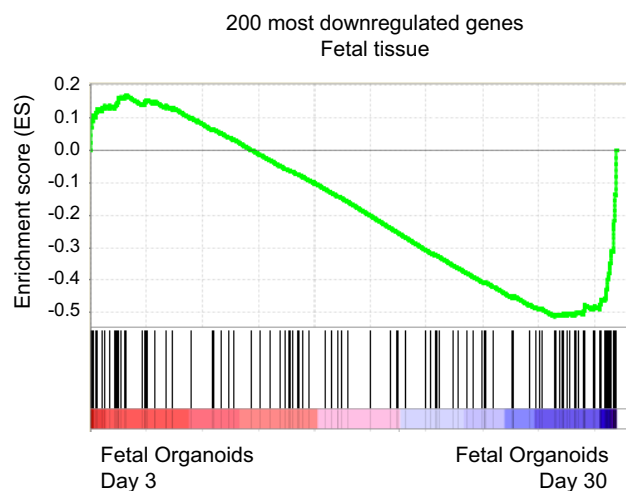

**Figure EV1. Comparison of organoid with tissue maturation.**

- A Pearson's correlation matrix including hierarchical clustering for whole-genome normalized microarray probes expressed in organoids/tissues indicated in the colored figure legend.
- B Pearson's correlation coefficient for the comparison of whole-genome normalized microarray probes between each of the sample listed on the x-axis and adult tissue. *P*-values indicate the results of Student's *t*-test. NS is not significant. *n* = 4.
- C, D Gene set enrichment analyses of 200 most (C) up- and (D) downregulated genes from mouse primary fetal versus adult epithelium (GSE35596) across fetal organoid maturation dataset. Vertical lines below x-axis display relative distribution of expression per gene included in the geneset.

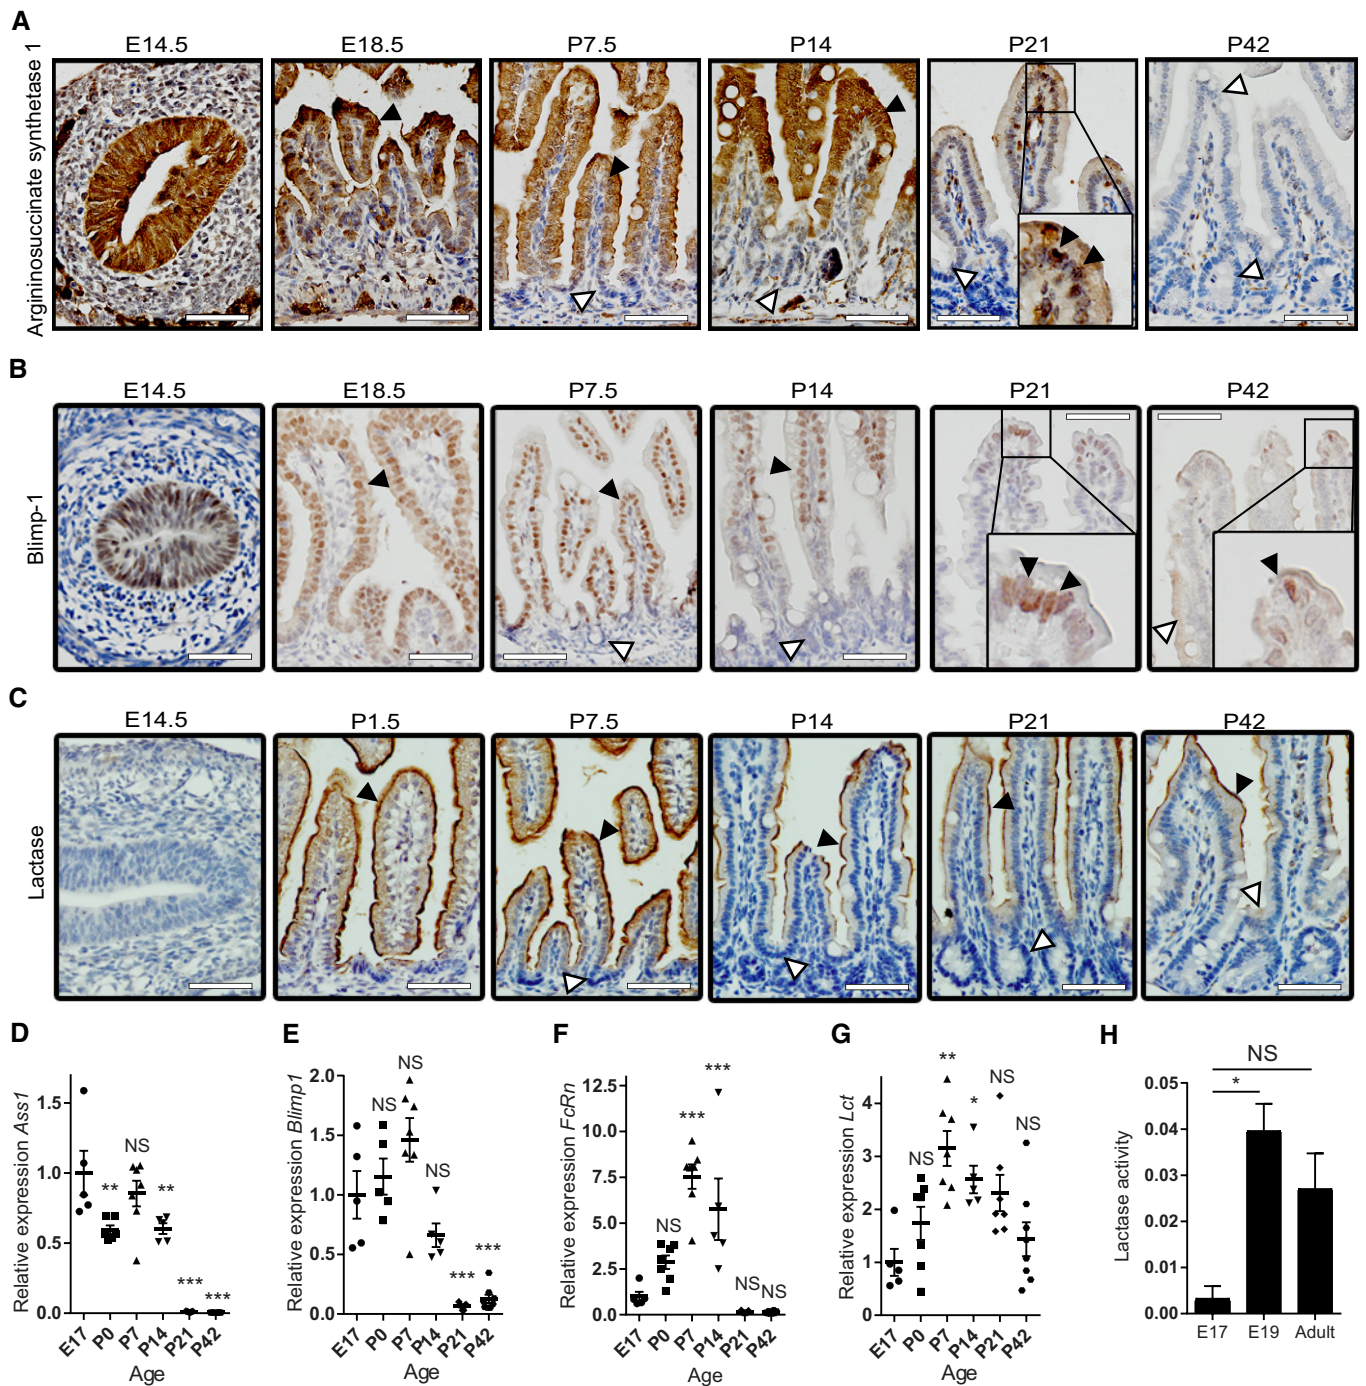

**Figure EV2. In vivo expression of neonatal intestinal epithelial markers.**

A–C Immunohistochemistry of neonatal markers: (A) *Ass1*, (B) *Blimp-1*, and (C) *Lct*. Insets represent higher magnification of the rectangle. White arrowheads indicate negative cells, and black arrowheads indicate positive cells. Scale bars: 50  $\mu$ m.

D–G Whole tissue real-time qPCR on (D) *Ass1*, (E) *Blimp-1*, (F) *FcRn*, and (G) *Lct* ( $n = 5$ –8 individual intestinal specimens generated from offspring of single pregnant mice for E17 and P0–21,  $n = 8$  independent intestines of adult mice for P42).

H Enzyme activity assay of fetal and adult whole tissue lysates for lactase ( $n = 3$ –5 individual intestinal specimens, generated from offspring of single pregnant mice for E17–19,  $n = 5$  independent intestines of adult mice for P42).

Data information: Data are presented as mean  $\pm$  SEM. \* $P < 0.05$ , \*\* $P < 0.01$ , \*\*\* $P < 0.001$ , NS: not significant, in (D–G) relative to expression level at E17 (one-way ANOVA).

**Figure EV3. *In vivo* expression of adult intestinal epithelial markers.**

- A, B Immunohistochemistry of adult markers (A) *Sis* and (B) *Arg2*. Insets represent higher magnification of the rectangle. White arrowheads indicate negative cells, and black arrowheads indicate positive cells. Scale bars: 50  $\mu\text{m}$ .
- C–H Whole tissue real-time qPCR on (C) *Sis*, (D) *Arg2*, (E) *Treh*, (F) *Lyz1*, (G) *Defcr1*, and (H) *Defcr5* ( $n = 5$ –8 individual intestinal specimens generated from offspring of single pregnant mice for E17 and P0–21,  $n = 4$ –8 independent intestines of adult mice for P42).
- I–L Enzyme activity assay of fetal and adult whole tissue lysates for (I) sucrase, (J) maltase, (K) trehalase, and (L) arginase activities ( $n = 3$ –5 individual intestinal specimens, generated from offspring of single pregnant mice for E17–19,  $n = 5$  independent intestines of adult mice for P42).

Data information: Data are presented as mean  $\pm$  SEM. ND not detected, \* $P < 0.05$ , \*\* $P < 0.01$ , \*\*\* $P < 0.001$ , NS: not significant, in (C–H) relative to expression level at E17 (one-way ANOVA).

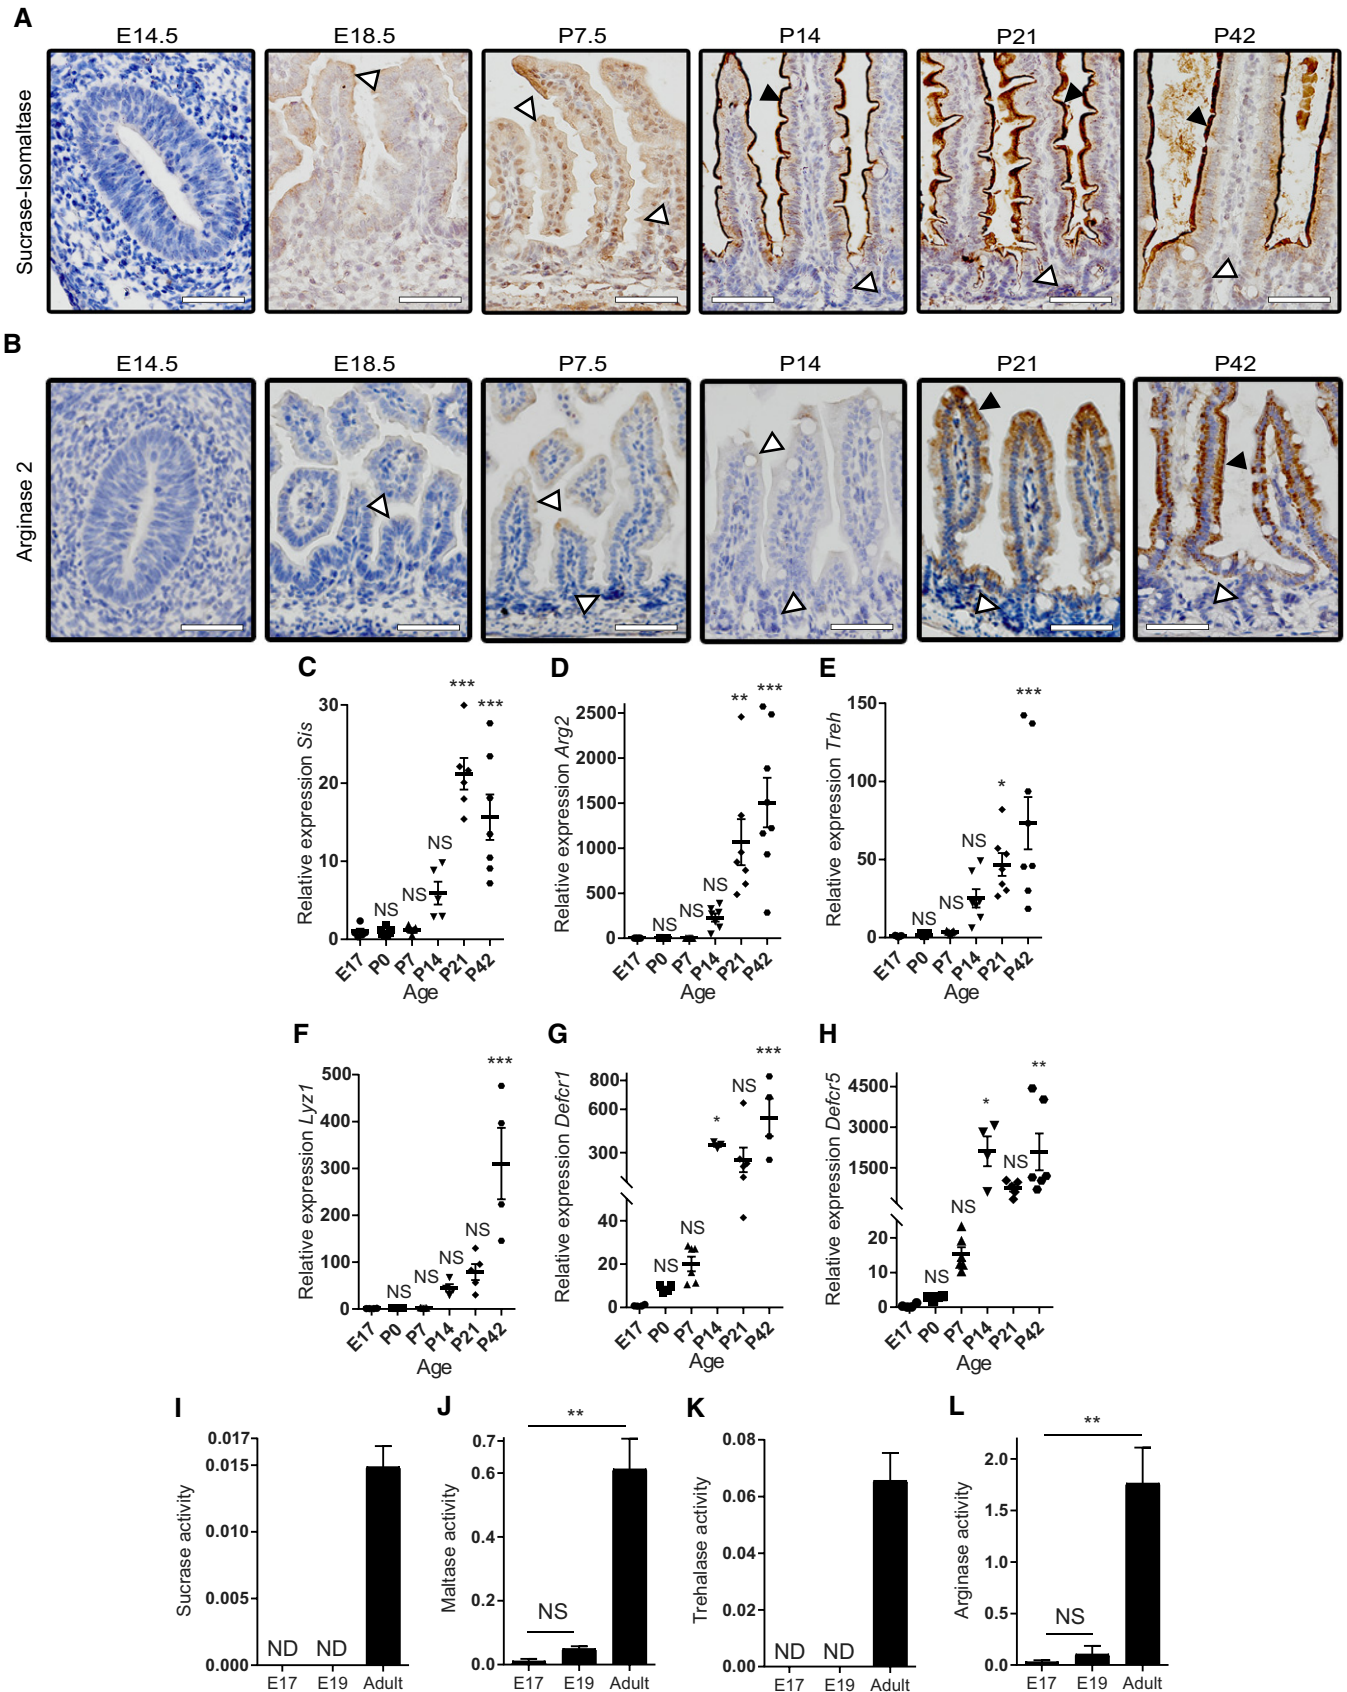

Figure EV3.



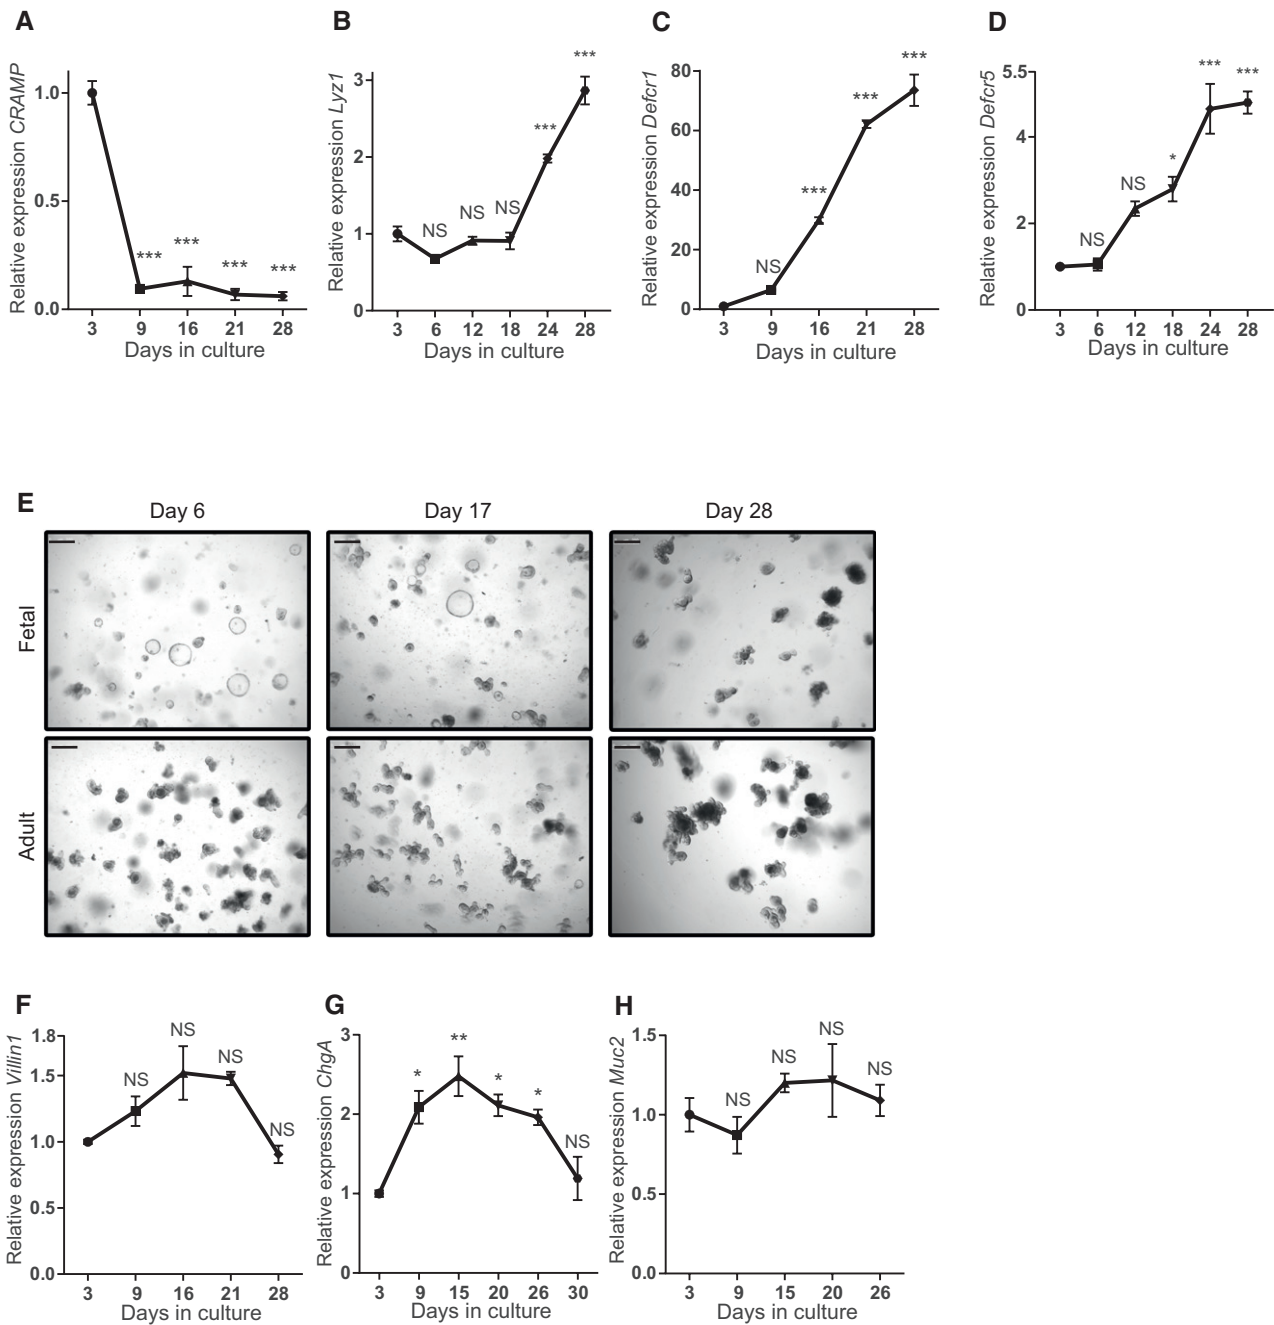

**Figure EV4. Fetal organoids mature *in vitro*.**

A–D Real-time qPCR analysis of fetal organoids cultured for 1 month showing decrease in relative expression of (A) *CRAMP* and increase in the Paneth cell markers (B) *Lyz1*, (C) *Defcr1*, and (D) *Defcr5* ( $n = 3$  individual wells from single organoid culture (see Materials and Methods); experiment was repeated four times with similar results).

E Microscopic images of fetal and adult organoids at days 6, 17, and 28 of culture. Scale bars: 250  $\mu$ m.

F–H Real-time qPCR of (F) *Villin1*, (G) *ChgA*, and (H) *Muc2* ( $n = 3$  individual wells from single organoid culture (see Materials and Methods); experiment was repeated four times with similar results).

Data information: Data are presented as mean  $\pm$  SEM. \* $P < 0.05$ , \*\* $P < 0.01$ , \*\*\* $P < 0.001$ , NS: not significant, relative to expression level at day 3 (one-way ANOVA).

**Figure EV5. Spheroid and organoid culture follow the same dynamics as mixed culture.**

- A Scheme of culture separation.
- B–D Percentage of spheroids versus organoids in (B) mixed culture, (C) spheroids, and (D) organoids ( $n = 3$  individual wells from single organoid culture (see Materials and Methods); experiment was repeated four times with similar results).
- E Microscopic images of mixed culture at days 1, 3, and 4 post-passage (p.p.), showing the transition of spheroids 1 and 2 into organoids between passage 1 and passage 2. Scale bars: 500  $\mu\text{m}$ .
- F, G Microscopic images of (F) spheroid and (G) organoid culture at days 0, 1, 4, and 5 post-passage (p.p.), showing the conversion of spheroids 1, 2, and 3 into organoids between passage 1 and passage 2. Scale bars: 500  $\mu\text{m}$ .

Data information: Data are presented as mean  $\pm$  SEM.

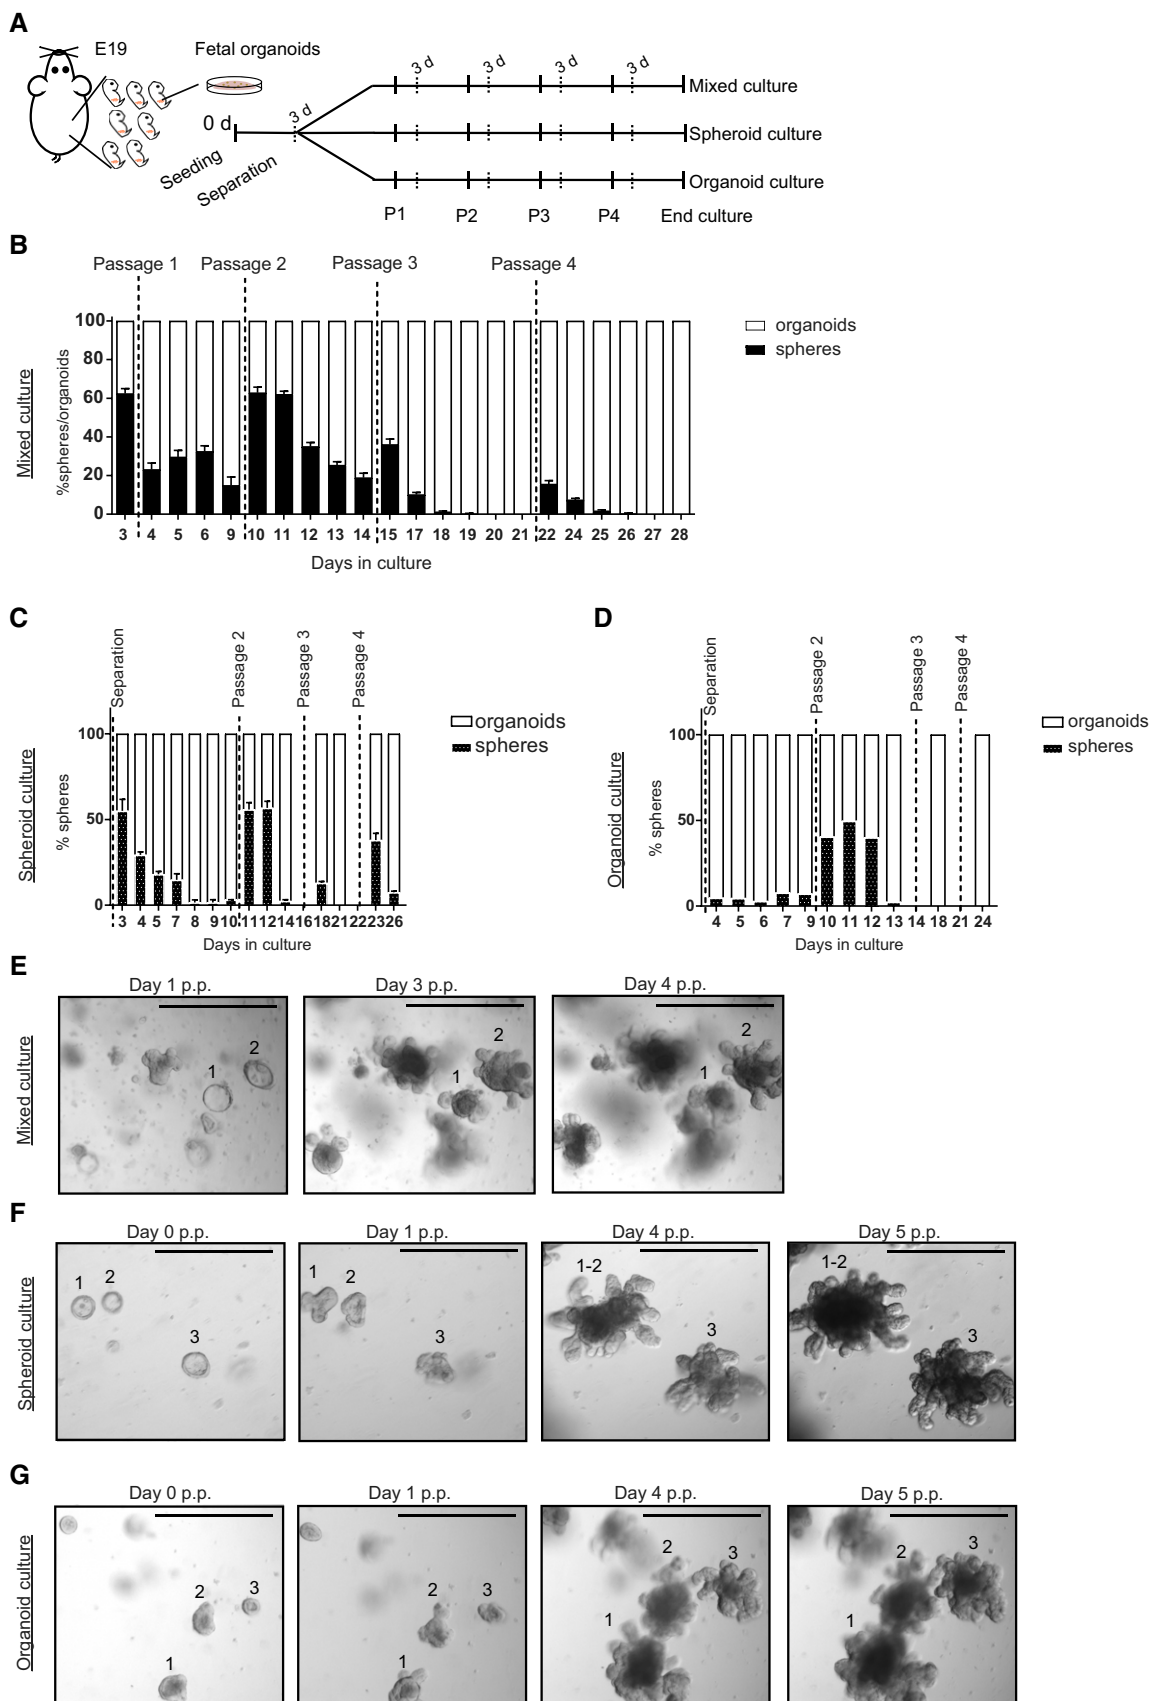

Figure EV5.
